# Supplementary material
Source: publisher site journal article supplement (https://www.dovepress.com/get_supplementary_file.php?f=193808-TS2.xlsx)
Supplement: Supplementary file 1 [file get_supplementary_file.php]

## Sheet: TableS2
TableS2: KEGG pathways enriched of the DEGs between S1 and S2
KEGG_term	Num_genes	p_adjust	pvalue
Protein digestion and absorption	9	0.0018585	9.48214e-06
AGE-RAGE signaling pathway in diabetic complications	7	0.0816539	0.000833203
ECM-receptor interaction	6	0.0869233	0.00165303
Phenylalanine metabolism	3	0.0869233	0.00211761
Tyrosine metabolism	4	0.0869233	0.00221743
PI3K-Akt signaling pathway	13	0.105068	0.00321636
Maturity onset diabetes of the young	3	0.183622	0.00731538
Complement and coagulation cascades	5	0.183622	0.00749479
Hypertrophic cardiomyopathy (HCM)	5	0.200258	0.00919551
Vascular smooth muscle contraction	6	0.208774	0.0111501
Focal adhesion	8	0.208774	0.0120414
Dilated cardiomyopathy (DCM)	5	0.208774	0.0127821
Prostate cancer	5	0.253165	0.0172158
Renin secretion	4	0.253165	0.0180832
Glycine, serine and threonine metabolism	3	0.291186	0.0237703
Tryptophan metabolism	3	0.291186	0.0237703
Arrhythmogenic right ventricular cardiomyopathy (ARVC)	4	0.291838	0.0253125
Human papillomavirus infection	10	0.407955	0.0374653
Malaria	3	0.413847	0.0401178
Relaxin signaling pathway	5	0.493327	0.0513727
Vitamin digestion and absorption	2	0.493327	0.0528564
Glutathione metabolism	3	0.497848	0.0558809
Apelin signaling pathway	5	0.504919	0.0616624
Amoebiasis	4	0.504919	0.0618268
Calcium signaling pathway	6	0.508987	0.0649219
Arachidonic acid metabolism	3	0.555269	0.0741461
Wnt signaling pathway	5	0.555269	0.0764912
Central carbon metabolism in cancer	3	0.558575	0.0797965
Insulin resistance	4	0.571914	0.08462
Glycolysis / Gluconeogenesis	3	0.578932	0.088612
Proteoglycans in cancer	6	0.583383	0.0922698
Drug metabolism - cytochrome P450	3	0.589165	0.100971
Adherens junction	3	0.589165	0.100971
Prion diseases	2	0.589165	0.102202
Starch and sucrose metabolism	2	0.594919	0.107157
cGMP-PKG signaling pathway	5	0.594919	0.109271
Pyruvate metabolism	2	0.640254	0.122392
EGFR tyrosine kinase inhibitor resistance	3	0.640254	0.124131
Porphyrin and chlorophyll metabolism	2	0.694115	0.138115
TGF-beta signaling pathway	3	0.694547	0.141744
Gap junction	3	0.727978	0.156403
Taurine and hypotaurine metabolism	1	0.727978	0.15827
Type II diabetes mellitus	2	0.727978	0.159709
Morphine addiction	3	0.743625	0.167695
Valine, leucine and isoleucine degradation	2	0.743625	0.17073
Cocaine addiction	2	0.751141	0.176288
Arginine and proline metabolism	2	0.755953	0.181875
Cell adhesion molecules (CAMs)	4	0.755953	0.185131
cAMP signaling pathway	5	0.776207	0.194052
Choline metabolism in cancer	3	0.779637	0.198887
Glucagon signaling pathway	3	0.818586	0.214982
Cushing syndrome	4	0.818586	0.217176
Parathyroid hormone synthesis, secretion and action	3	0.84033	0.227232
Selenocompound metabolism	1	0.841012	0.233855
JAK-STAT signaling pathway	4	0.841012	0.243832
Leukocyte transendothelial migration	3	0.841012	0.252111
Cortisol synthesis and secretion	2	0.841012	0.261963
Inflammatory bowel disease (IBD)	2	0.841012	0.267746
Glycosaminoglycan biosynthesis - chondroitin sulfate / dermatan sulfate	1	0.841012	0.269084
One carbon pool by folate	1	0.841012	0.269084
Retinol metabolism	2	0.841012	0.279311
Amphetamine addiction	2	0.841012	0.285089
AMPK signaling pathway	3	0.841012	0.285856
Axon guidance	4	0.841012	0.288563
Platelet activation	3	0.841012	0.298619
Glioma	2	0.841012	0.302396
Histidine metabolism	1	0.841012	0.302706
Renin-angiotensin system	1	0.841012	0.302706
Proximal tubule bicarbonate reclamation	1	0.841012	0.302706
Cytokine-cytokine receptor interaction	6	0.841012	0.306203
Melanoma	2	0.841012	0.308151
MAPK signaling pathway	6	0.841012	0.308943
Thyroid hormone synthesis	2	0.846203	0.319633
Transcriptional misregulation in cancer	4	0.846203	0.327284
Metabolism of xenobiotics by cytochrome P450	2	0.846203	0.331071
Ascorbate and aldarate metabolism	1	0.846203	0.345162
Glycosphingolipid biosynthesis - lacto and neolacto series	1	0.846203	0.345162
Butanoate metabolism	1	0.846203	0.355369
Peroxisome	2	0.846203	0.370643
Citrate cycle (TCA cycle)	1	0.846203	0.375312
Glyoxylate and dicarboxylate metabolism	1	0.846203	0.375312
Nicotinate and nicotinamide metabolism	1	0.846203	0.375312
Insulin secretion	2	0.846203	0.381789
beta-Alanine metabolism	1	0.846203	0.385053
Antifolate resistance	1	0.846203	0.385053
Adrenergic signaling in cardiomyocytes	3	0.846203	0.388107
GABAergic synapse	2	0.846203	0.398351
Breast cancer	3	0.846203	0.400752
Apoptosis - multiple species	1	0.846203	0.404086
Th1 and Th2 cell differentiation	2	0.846203	0.420114
Alanine, aspartate and glutamate metabolism	1	0.846203	0.422534
African trypanosomiasis	1	0.846203	0.422534
Regulation of actin cytoskeleton	4	0.846203	0.42291
Hippo signaling pathway	3	0.846203	0.429967
Neuroactive ligand-receptor interaction	5	0.846203	0.431456
NF-kappa B signaling pathway	2	0.846203	0.436174
Thyroid cancer	1	0.846203	0.440416
Primary immunodeficiency	1	0.846203	0.440416
Aldosterone synthesis and secretion	2	0.846203	0.441475
Endocrine resistance	2	0.846203	0.451996
HIF-1 signaling pathway	2	0.846203	0.462405
Ferroptosis	1	0.846203	0.466215
Nicotine addiction	1	0.846203	0.466215
Melanogenesis	2	0.846203	0.467567
Chagas disease (American trypanosomiasis)	2	0.846203	0.4727
Fat digestion and absorption	1	0.846203	0.47455
Bladder cancer	1	0.846203	0.47455
Graft-versus-host disease	1	0.846203	0.47455
Ras signaling pathway	4	0.846203	0.488441
Th17 cell differentiation	2	0.846203	0.497916
Fatty acid degradation	1	0.846203	0.498788
ABC transporters	1	0.846203	0.498788
Vasopressin-regulated water reabsorption	1	0.846203	0.498788
Carbohydrate digestion and absorption	1	0.846203	0.498788
Purine metabolism	3	0.846203	0.510301
TNF signaling pathway	2	0.846203	0.512678
Cysteine and methionine metabolism	1	0.846203	0.521917
Hedgehog signaling pathway	1	0.846203	0.521917
Endocrine and other factor-regulated calcium reabsorption	1	0.846203	0.521917
Notch signaling pathway	1	0.846203	0.529389
Serotonergic synapse	2	0.846203	0.536647
N-Glycan biosynthesis	1	0.846203	0.536745
Intestinal immune network for IgA production	1	0.846203	0.536745
Carbon metabolism	2	0.846203	0.541344
Thyroid hormone signaling pathway	2	0.846203	0.541344
Cholesterol metabolism	1	0.846203	0.543988
Mineral absorption	1	0.850544	0.551118
Chemokine signaling pathway	3	0.86755	0.566563
Legionellosis	1	0.870762	0.578549
Staphylococcus aureus infection	1	0.870762	0.585143
Endometrial cancer	1	0.870762	0.598026
Dopaminergic synapse	2	0.870762	0.607833
FoxO signaling pathway	2	0.870762	0.611999
Glycerolipid metabolism	1	0.870762	0.61661
Rap1 signaling pathway	3	0.870762	0.625405
Cytosolic DNA-sensing pathway	1	0.870762	0.628524
Basal cell carcinoma	1	0.870762	0.628524
Insulin signaling pathway	2	0.870762	0.632328
Estrogen signaling pathway	2	0.870762	0.632328
Fluid shear stress and atherosclerosis	2	0.870762	0.640226
Acute myeloid leukemia	1	0.870762	0.645709
Epithelial cell signaling in Helicobacter pylori infection	1	0.870762	0.656726
Hepatitis B	2	0.870762	0.659394
Adipocytokine signaling pathway	1	0.870762	0.662106
Phospholipase D signaling pathway	2	0.870762	0.666832
Prolactin signaling pathway	1	0.870762	0.667403
B cell receptor signaling pathway	1	0.870762	0.672617
Bile secretion	1	0.870762	0.672617
Non-alcoholic fatty liver disease (NAFLD)	2	0.870762	0.677745
p53 signaling pathway	1	0.870762	0.677751
Human cytomegalovirus infection	3	0.870762	0.68451
Inositol phosphate metabolism	1	0.870762	0.687779
PPAR signaling pathway	1	0.870762	0.687779
MicroRNAs in cancer	4	0.870762	0.688812
Biosynthesis of amino acids	1	0.870762	0.692677
Pertussis	1	0.870762	0.697498
Chronic myeloid leukemia	1	0.870762	0.697498
Cardiac muscle contraction	1	0.876935	0.706917
Cellular senescence	2	0.877052	0.71531
Chemical carcinogenesis	1	0.877052	0.724892
Taste transduction	1	0.877052	0.729212
Hepatocellular carcinoma	2	0.877052	0.740289
Salmonella infection	1	0.877052	0.741773
Colorectal cancer	1	0.877052	0.741773
Tight junction	2	0.877052	0.746238
Influenza A	2	0.877052	0.749168
Longevity regulating pathway	1	0.877052	0.753756
Rheumatoid arthritis	1	0.877052	0.757626
Human T-cell leukemia virus 1 infection	3	0.877052	0.763377
IL-17 signaling pathway	1	0.877052	0.768879
GnRH signaling pathway	1	0.877052	0.768879
Alcoholism	2	0.877052	0.774269
Circadian entrainment	1	0.877052	0.779615
Glycerophospholipid metabolism	1	0.877052	0.783082
Hematopoietic cell lineage	1	0.877052	0.783082
Inflammatory mediator regulation of TRP channels	1	0.879611	0.789855
Toll-like receptor signaling pathway	1	0.887379	0.805885
C-type lectin receptor signaling pathway	1	0.887379	0.805885
Cholinergic synapse	1	0.907784	0.829047
Neurotrophin signaling pathway	1	0.922347	0.847053
Autophagy - animal	1	0.939356	0.867466
Measles	1	0.939958	0.875648
Systemic lupus erythematosus	1	0.939958	0.877614
Signaling pathways regulating pluripotency of stem cells	1	0.946744	0.88878
Retrograde endocannabinoid signaling	1	0.953404	0.903662
Gastric cancer	1	0.953404	0.905188
Phagosome	1	0.953404	0.909625
NOD-like receptor signaling pathway	1	0.96961	0.930034
Tuberculosis	1	0.97238	0.941342
Herpes simplex infection	1	0.97238	0.946726
Kaposi sarcoma-associated herpesvirus infection	1	0.97238	0.947575
Huntington disease	1	0.973007	0.95315
Viral carcinogenesis	1	0.973709	0.958805
Thermogenesis	1	0.983807	0.973768
Endocytosis	1	0.98444	0.979417
Olfactory transduction	1	0.999278	0.999278
